# Supplementary material for: The mutation of Trp64Arg in β3-adrenoreceptor-encoding gene is significantly associated with increased hypertension risk and elevated blood pressure: a meta-analysis
Source: PubMed Central journal article supplement (PMC5542283; doi:10.18632/oncotarget.16666), 2017-03-29
Supplement: oncotarget-08-46480-s001.pdf [file oncotarget-08-46480-s001.pdf]

## **The mutation of Trp64Arg in $\beta$ 3-adrenoreceptor-encoding gene is significantly associated with increased hypertension risk and elevated blood pressure: a meta-analysis**

### **Supplementary Materials**

**Supplementary Table 1: The baseline characteristics of all association studies for hypertension risk.** See Supplementary\_ Table\_1
